# Supplementary material for: Outcomes of long-term nivolumab and subsequent chemotherapy in Japanese patients with head and neck cancer: 2-year follow-up from a multicenter real-world study
Source: PubMed Central journal article supplement (PMC8732924; doi:10.1007/s10147-021-02047-y), 2021-11-13
Supplement: 10147_2021_2047_MOESM4_ESM.pdf [file 10147_2021_2047_MOESM4_ESM.pdf]

## Online Resource 4

**Outcomes of long-term nivolumab and subsequent chemotherapy in Japanese patients with head and neck cancer: 2-year follow-up from a multicenter real-world study**

*International Journal of Clinical Oncology*

Ryuji Yasumatsu, Yasushi Shimizu, Nobuhiro Hanai, Shin Kariya, Tomoya Yokota, Takashi Fujii, Kiyooki Tsukahara, Mizuo Ando, Kenji Hanyu, Tsutomu Ueda, Hitoshi Hirakawa, Shunji Takahashi, Takeharu Ono, Daisuke Sano, Moriyasu Yamauchi, Akihito Watanabe, Koichi Omori, Tomoko Yamazaki, Nobuya Monden, Naomi Kudo, Makoto Arai, Syuji Yonekura, Takahiro Asakage, Takahiro Nekado, Takayuki Yamada, Akihiro Homma

**Corresponding Author:** Akihiro Homma, E-mail: [ak-homma@med.hokudai.ac.jp](mailto:ak-homma@med.hokudai.ac.jp)

**Baseline characteristics in patients with SCC**

| Characteristic                     | Patients with SCC<br>(n=217) |                                 |                            |         |
|------------------------------------|------------------------------|---------------------------------|----------------------------|---------|
|                                    |                              | Non-2-year survivors<br>(n=167) | 2-year survivors<br>(n=50) | P value |
| <b>Sex</b>                         |                              |                                 |                            | 0.5863  |
| Male                               | 172 (79.3)                   | 131 (78.4)                      | 41 (82.0)                  |         |
| Female                             | 45 (20.7)                    | 36 (21.6)                       | 9 (18.0)                   |         |
| <b>Age*, years, median (range)</b> | 67 (24–84)                   | 66 (24–84)                      | 67 (44–78)                 | 0.0326  |
| <b>Age category</b>                |                              |                                 |                            |         |
| <65 years                          | 87 (40.1)                    | 73 (43.7)                       | 14 (28.0)                  |         |
| ≥65 and <75 years                  | 108 (49.8)                   | 74 (44.3)                       | 34 (68.0)                  |         |
| ≥75 years                          | 22 (10.1)                    | 20 (12.0)                       | 2 (4.0)                    |         |
| <b>ECOG PS*</b>                    |                              |                                 |                            | 0.0007  |
| 0                                  | 91 (41.9)                    | 62 (37.1)                       | 29 (58.0)                  |         |
| 1                                  | 91 (41.9)                    | 72 (43.1)                       | 19 (38.0)                  |         |
| ≥2                                 | 29 (13.4)                    | 29 (17.4)                       | 0 (0.0)                    |         |
| Unknown                            | 6 (2.8)                      | 4 (2.4)                         | 2 (4.0)                    |         |
| <b>Primary site</b>                |                              |                                 |                            |         |
| Hypopharynx                        | 59 (27.2)                    | 47 (28.1)                       | 12 (24.0)                  | 0.5635  |
| Oral cavity                        | 54 (24.9)                    | 43 (25.7)                       | 11 (22.0)                  | 0.5907  |
| Oropharynx                         | 35 (16.1)                    | 26 (15.6)                       | 9 (18.0)                   | 0.6818  |
| Salivary gland                     | 5 (2.3)                      | 4 (2.4)                         | 1 (2.0)                    | 0.8702  |
| Larynx                             | 21 (9.7)                     | 17 (10.2)                       | 4 (8.0)                    | 0.6474  |
| Maxillary sinus                    | 11 (5.1)                     | 9 (5.4)                         | 2 (4.0)                    | 0.6944  |
| Nasopharynx*                       | 19 (8.8)                     | 11 (6.6)                        | 8 (16.0)                   | 0.0388  |
| Others                             | 13 (6.0)                     | 10 (6.0)                        | 3 (6.0)                    | 0.9975  |

\*Significant differences observed between non-2-year survivors and 2-year survivors in patients with SCC

Data are n (%) unless specified otherwise

SCC squamous cell carcinoma; ECOG PS Eastern Cooperative Oncology Group performance status
